# Supplementary material
Source: publisher figshare collection journal article supplement (https://diabetesjournals.figshare.com/ndownloader/files/34763041)
Supplement: Supplementary file 1 [file 34763041]

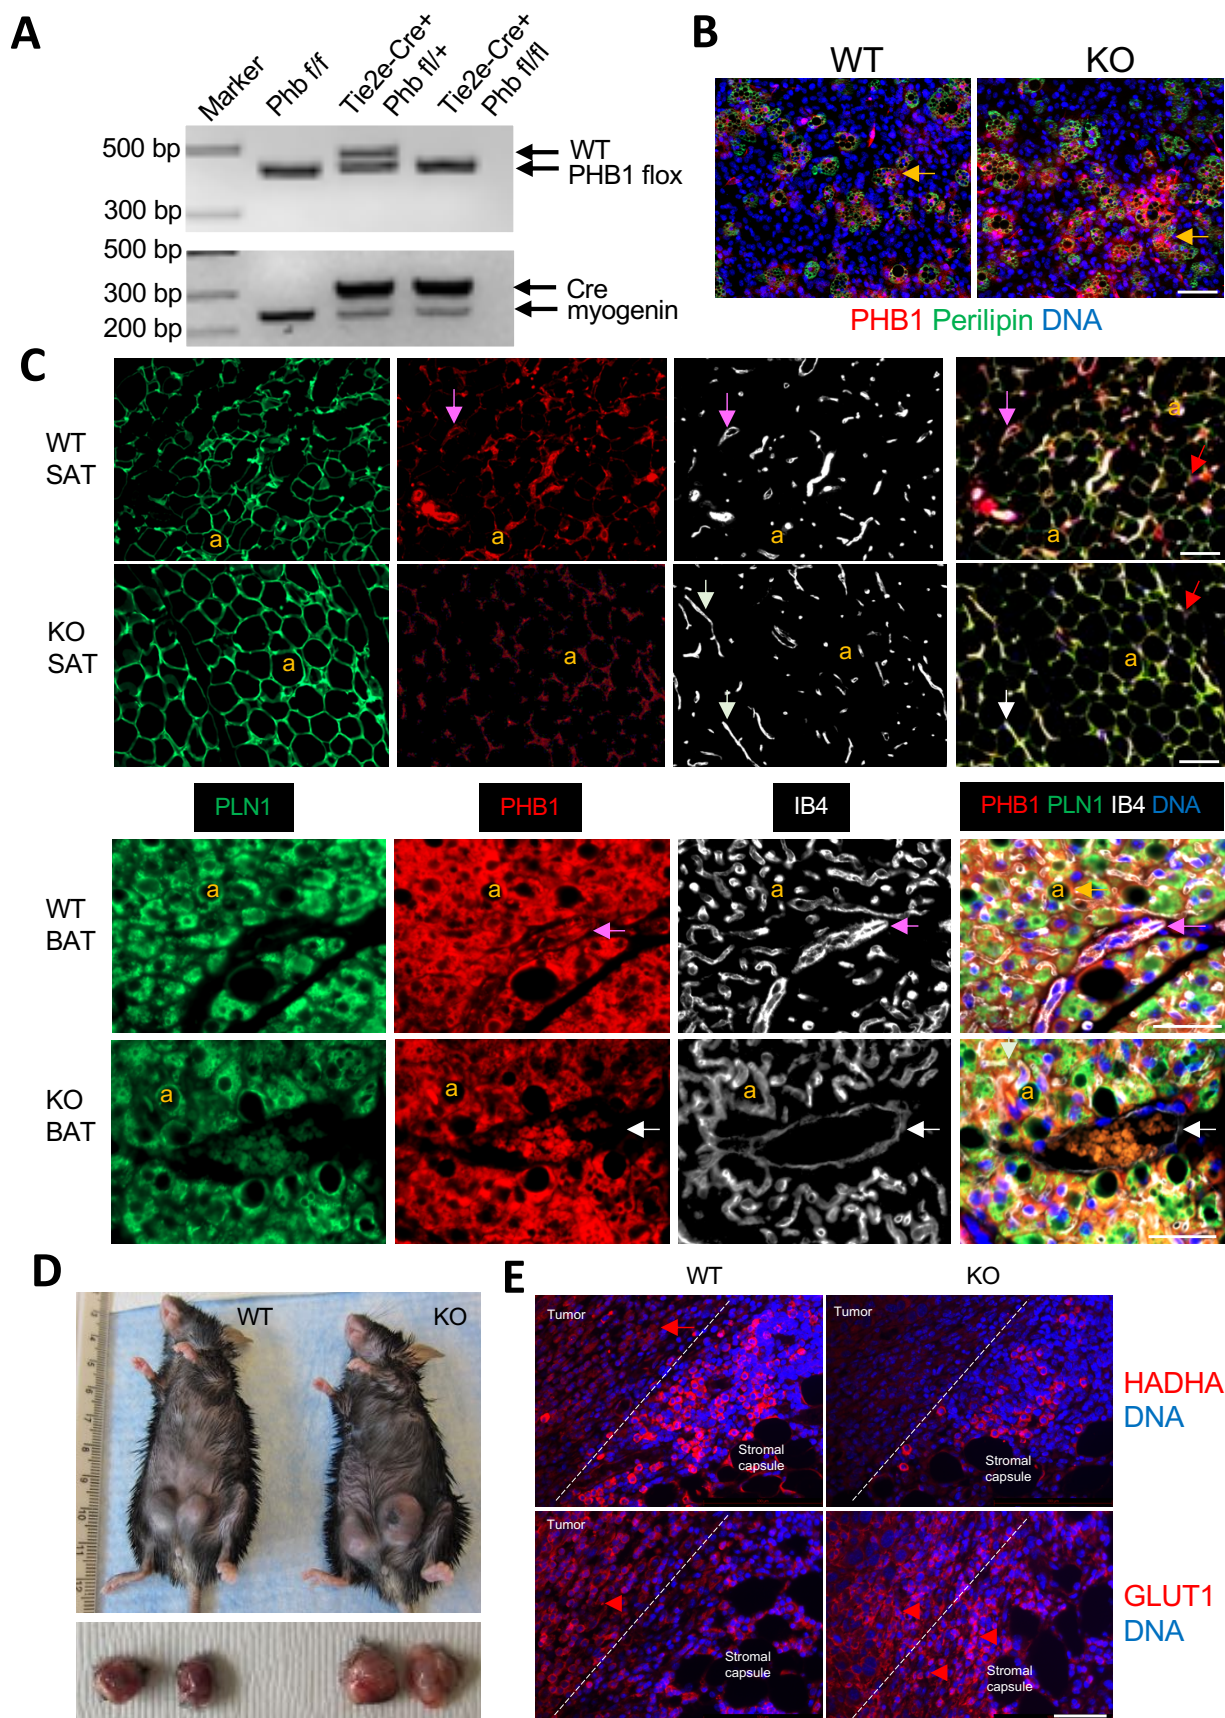

**Figure S1** - PHB1 EC KO mice have normal AT and vascularization. **A**: PCR genotyping identifying TIE2e-Cre<sup>+</sup>; PHB1<sup>fl/fl</sup> (EC-KO) and control Cre- PHB1<sup>fl/fl</sup> (WT) littermates. Myogenin PCR: DNA quality control. **B**: IF on MEFs subjected to adipogenesis reveals PHB1 in PLN1<sup>+</sup> adipocytes (yellow arrows). **C**: IF on SAT sections reveals PHB1 in IB4<sup>+</sup> endothelium of WT SAT and BAT (purple arrows), but not of KO SAT and BAT (white arrows). PLN1<sup>+</sup> adipocytes (a) are PHB1<sup>+</sup> in WT and KO SAT and BAT. **D**: Comparable orthotopic E0771 tumor growth in WT and PHB1-KO mice. Representative resected tumors are shown below. **E**: IF on sections of tumors from **D** reveals that cancer cell HADHA expression (arrow) is decreased and GLUT1 expression (arrowhead) in tumor stroma is increased in KO mice. Scale bar: 50  $\mu$ m.

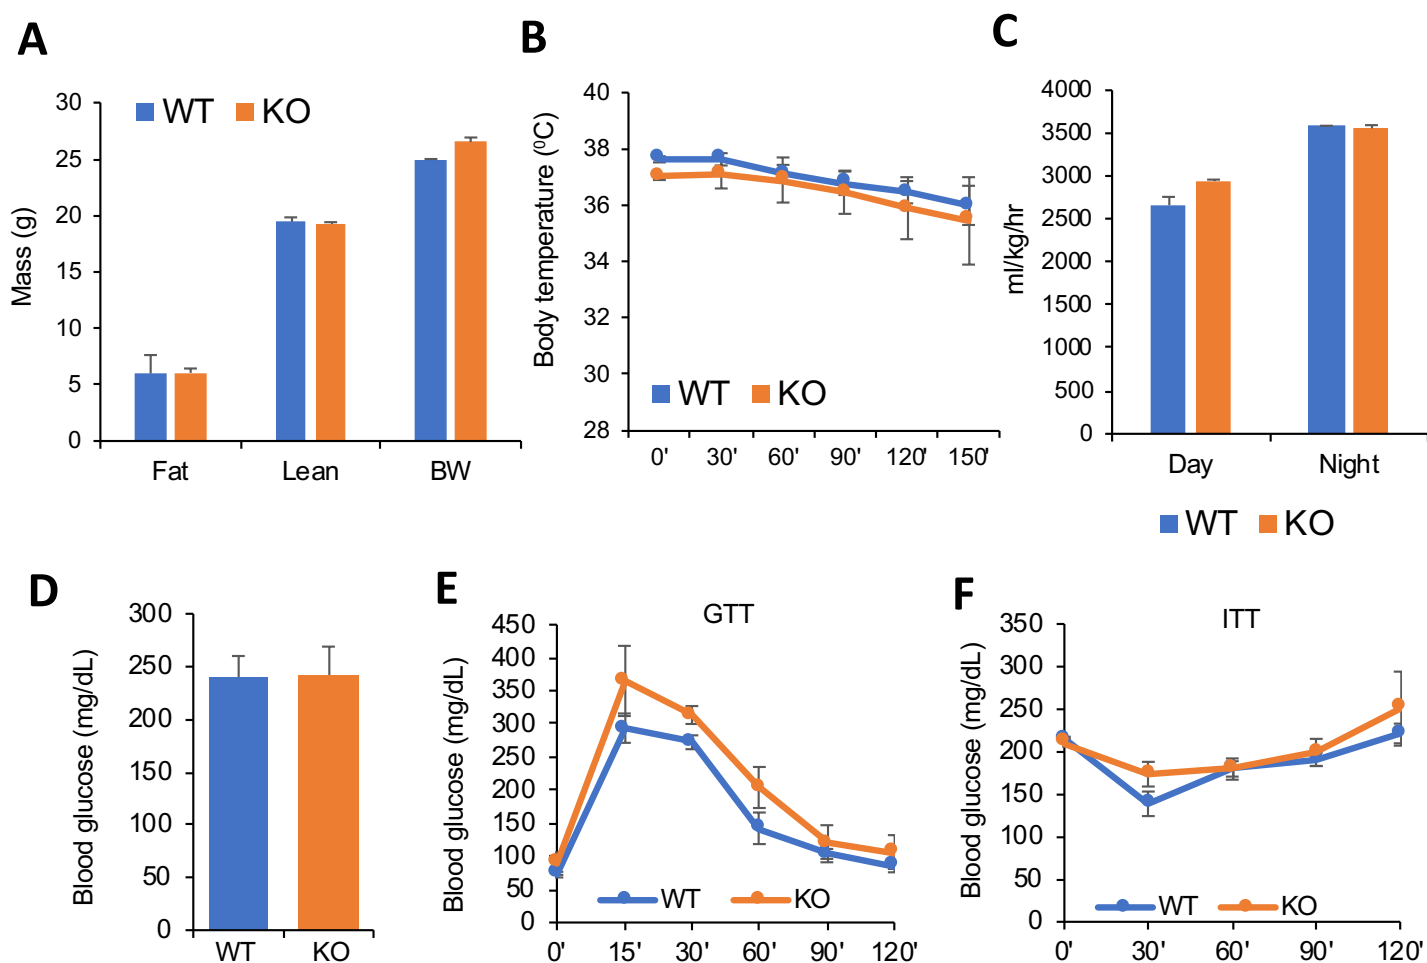

**Figure S2-** PHB1 EC KO mice have no metabolic phenotype on low-fat diet. For all panels, WT and PHB1 EC-KO female littermates (N=5) were analyzed at 15 weeks of age. **A:** EchoMRI analysis reveals no difference. **B:** Body temperature maintenance in mice placed at 4°C is similar. **C:** Oxygen consumption (VO<sub>2</sub>) measured by indirect calorimetry is similar. **D:** Non-fasting glucose concentration in blood is similar. **E:** Glucose tolerance test (GTT). After o/n fasting, mice were injected with glucose (2 g/kg body weight) i.p. and glucose in blood was measured. **F:** Insulin tolerance test (ITT). After 4 hr fasting, mice were injected with insulin (0.6 U/kg body weight) i.p. and glucose in blood was measured. In all panels, plotted are mean ± SEM.

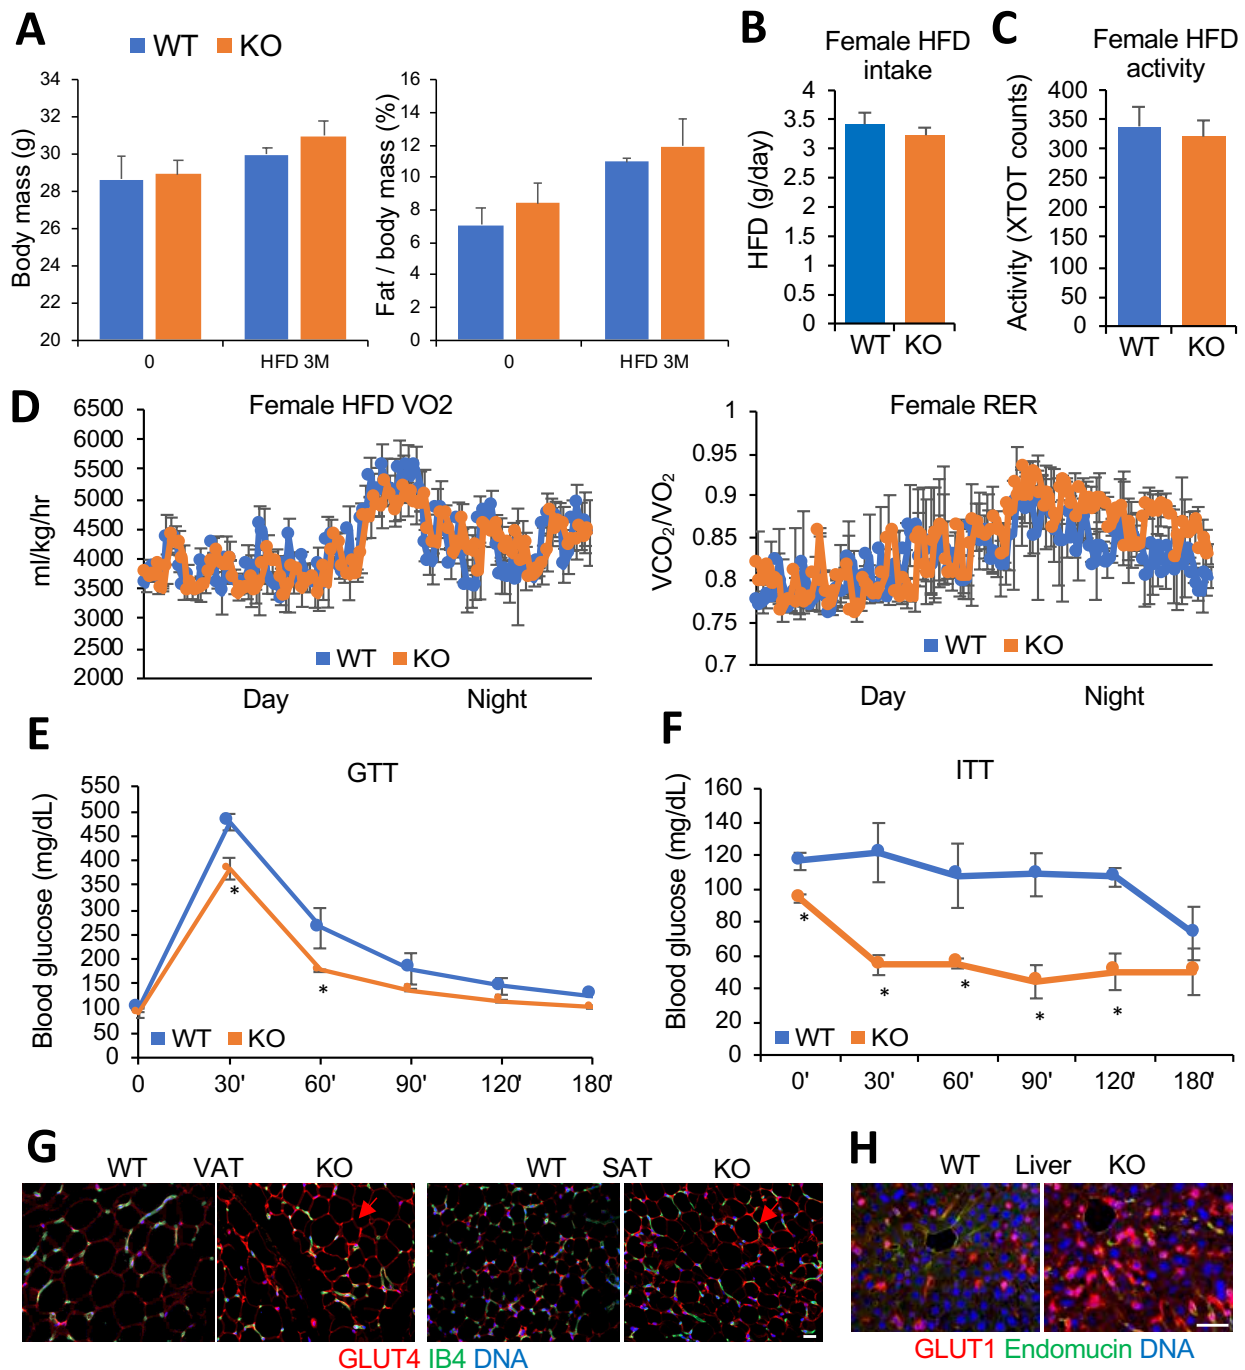

**Figure S3-** PHB1 EC KO mice have a metabolic phenotype on high-fat diet. For all panels, WT and PHB1 EC-KO littermates (N=5) were analyzed at 60 weeks of age after 3 months on HFD. **A:** EchoMRI analysis showing fat body mass increase of male mice. **B:** HFD consumption in female mice is similar. **C:** Spontaneous locomotor activity in female mice is similar. **D:** Indirect calorimetry data: oxygen consumption (VO<sub>2</sub>) and RER (VCO<sub>2</sub>/VO<sub>2</sub>) show an increase in KO female mice. **E:** GTT in o/n-fasted mice. **F:** ITT in 4 hr-fasted mice. **G:** IF on sections from WT and EC KO mice reveals that GLUT4 expression is increased in VAT and SAT of KO mice. **H:** IF on sections of livers from WT and EC KO mice reveals that GLUT1 expression is increased in hepatocytes of KO mice. Scale bar: 50  $\mu$ m. In all panels, plotted are mean  $\pm$  SEM. \* $P$ <0.05 (Student's t-test).



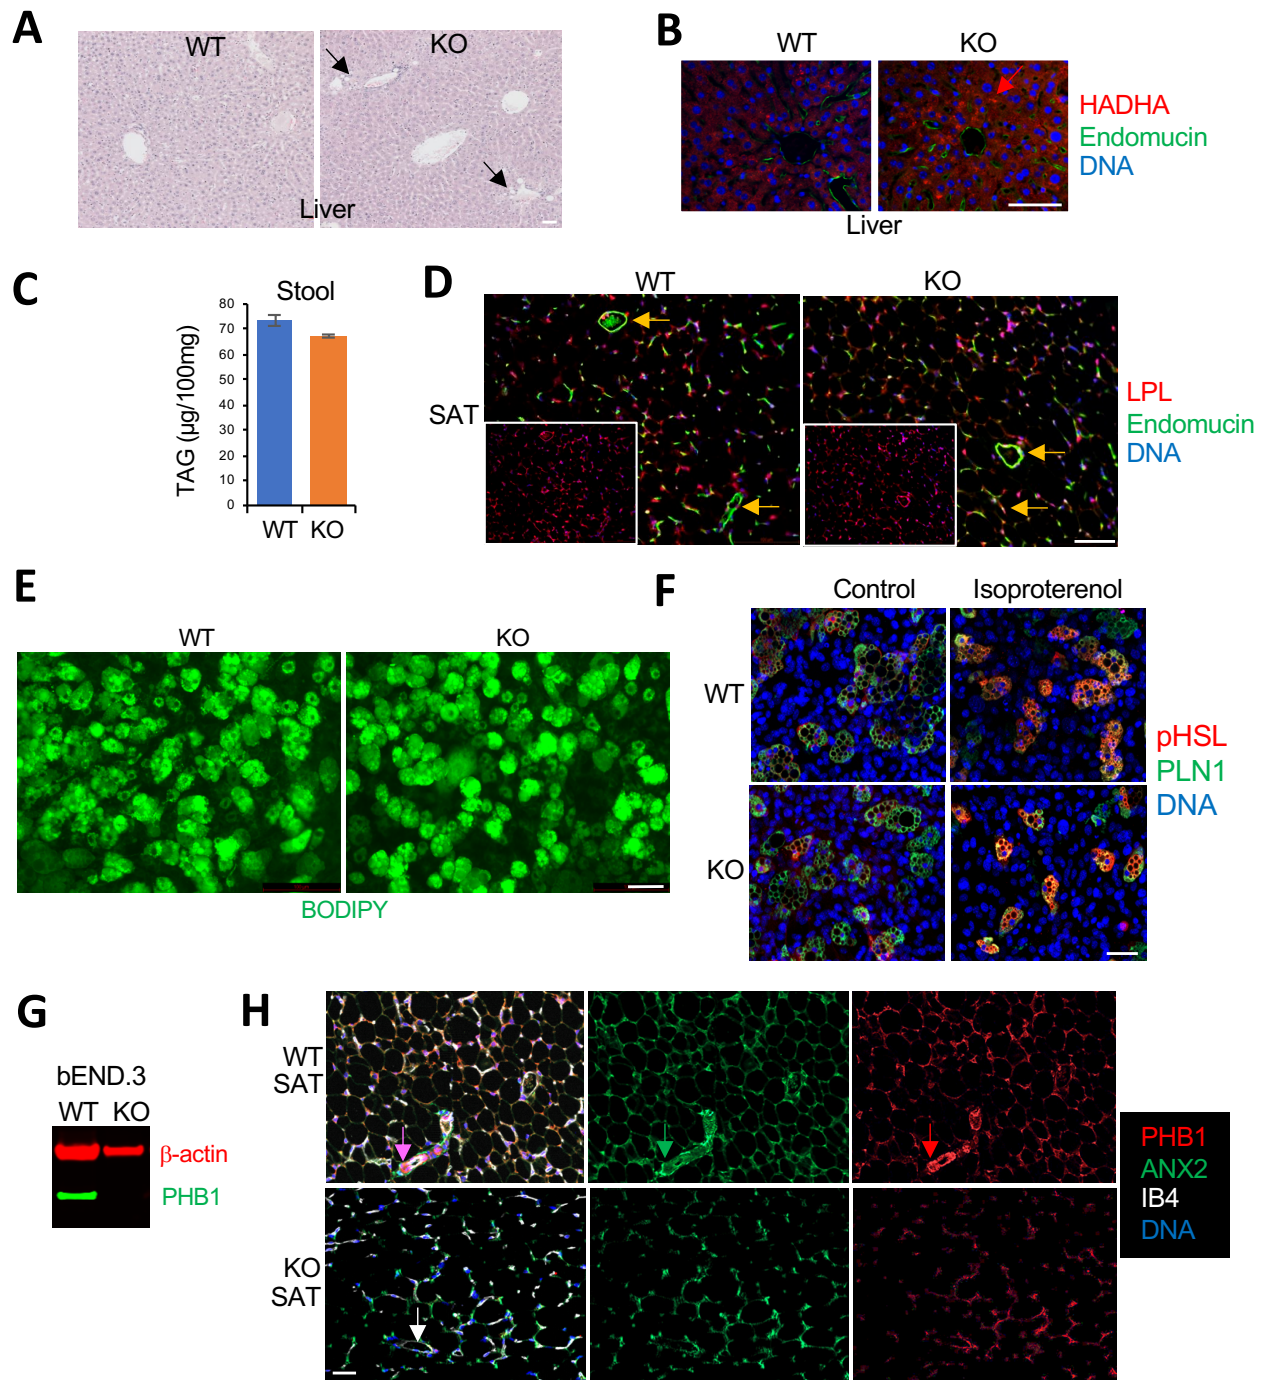

**Figure S4-** Phenotype of PHB1 EC KO mice. *A*: *IF* Lipid droplets (arrows) in H/E-stained livers of HFD-fed KO mice. *B*: *IF* on sections of livers from WT and EC KO mice reveals that HADHA expression is increased (arrow) in hepatocytes of KO mice. *C*: Similar triglyceride concentration in feces of WT and KO mice (N=5). *D*: *IF* reveals that LPL expression is comparable in the vasculature (arrows) SAT of WT and EC KO mice. *E*: Adipocytes differentiated from MEFs of WT and KO mice uptake BODIPY- $\text{C}_{16}$  ( $2\mu\text{M}$ ) equally well after 30 min. *F*: *IF* reveals that pHSL expression is comparable in adipocytes differentiated from MEFs of WT and KO mice at baseline and upon lipolysis stimulation with isoproterenol. *G*: Control (WT) and PHB1-KO bEND.3 cells subjected to Western blotting with PHB1 antibodies;  $\beta$ -actin: loading control. *H*: *IF* reveals that ANX2 expression (purple arrow) is reduced (white arrow) in the IB4+ SAT endothelium (white) of PHB1-EC KO mice. Scale bar: 50  $\mu\text{m}$ .



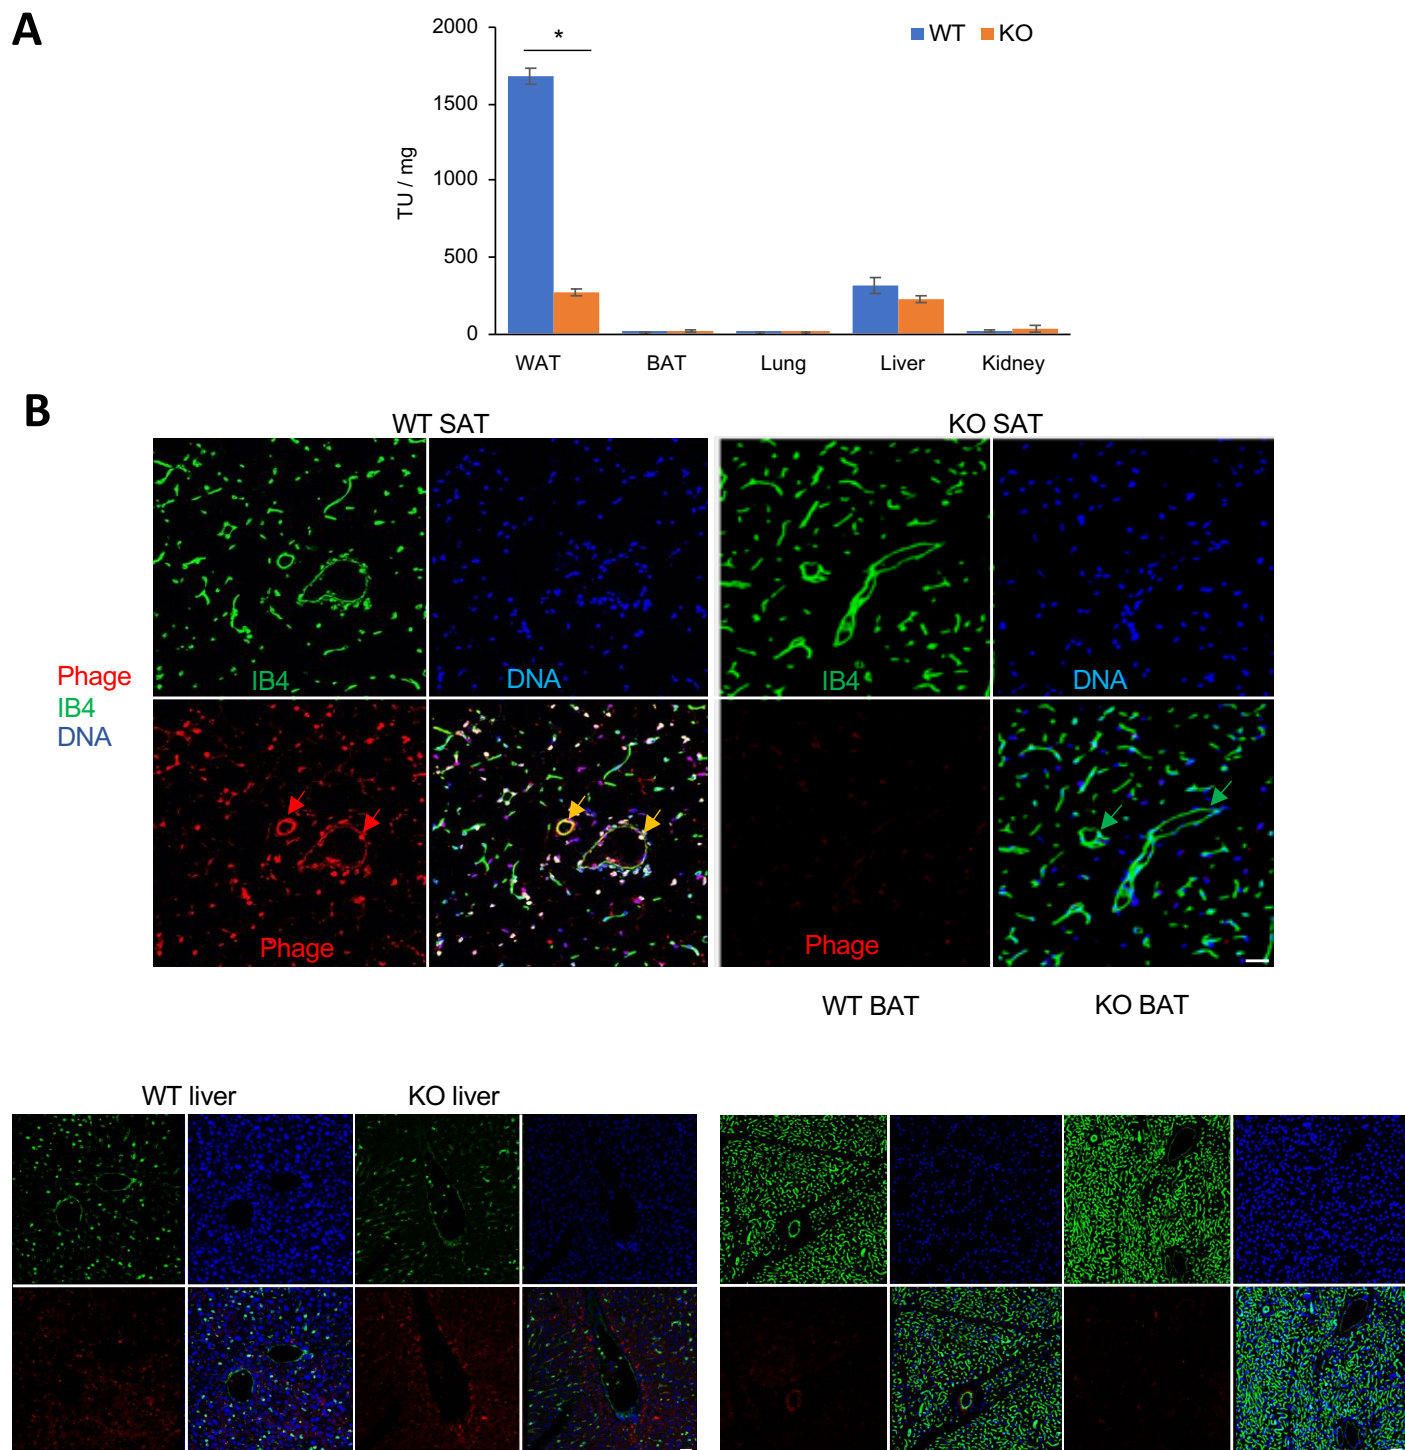

**Figure S5-** PHB1-binding peptide homing to AT. **A:** Homing of phage displaying KGGRAKD peptide upon administration of  $5 \times 10^{10}$  phage transforming units (TU) into mice. After 1 hr of circulation, phage accumulates in SAT (but not in BAT) of WT mice compared to PHB1 EC-KO littermates; there is no difference for control organs. Error bars: SD  $*P < 0.001$  (Student's t-test); N=3 phage TU recovery quantifications. **B:** Tissues of mice injected in (A) subjected to isolectin B4 (green) and anti-phage IF (red). Yellow arrows: phage signal in the endothelium of WT mice but not EC-KO littermates. Green arrows: phage-negative EC. Arrowheads: nonspecific liver trapping indicating equal phage injection. Individual channels are shown below. Scale bar: 50  $\mu$ m. Phage display assays were performed as described (9) by K91 E. coli infection and quantification by colony counting (A) and by IF with Sigma B7786 anti-Fd bacteriophage antibody (B).
